# Supplementary material for: Metabolomic Profiling Reveals Interindividual Metabolic Variability and Its Association with Cardiovascular-Kidney-Metabolic Disease Risk
Source: Research Square preprint supplement (doi:10.21203/rs.3.rs-6870432/v1), 2025-07-22
Supplement: Supplementary file 1 [file 06accb03717efa77a41296cb.docx]

**Metabolomic Profiling Reveals Interindividual Metabolic** **Variability and Its Association with Cardiovascular-Kidney-Metabolic Disease Risk**

Meng Zhou1, 2, Wenxiu Sun3, Yuhan Gao1, 2, Bei Jiang1, 2, Tianwei Sun1, 2, Rui Xu1, 2, Xiujuan Zhang4#, Qian Wang5#, Qiuhui Xuan1, 2#, Shizhan Ma1, 2#

1Key Laboratory of Endocrine Glucose & Lipids Metabolism and Brain Aging, Ministry of Education; Department of Endocrinology, Shandong Provincial Hospital Affiliated to Shandong First Medical University, Jinan, Shandong, China.

2Shandong Institute of Endocrine and Metabolic Disease, Jinan, Shandong, China.

3 Department of Nursing, Taishan Vocational College of Nursing, Taian, China.

4Health Management Center, Shandong Provincial Hospital Affiliated to Shandong First Medical University, Jinan, Shandong, China.

5Department of Ultrasound, Shandong Provincial Hospital affiliated to Shandong First Medical University, Jinan, Shandong, China.


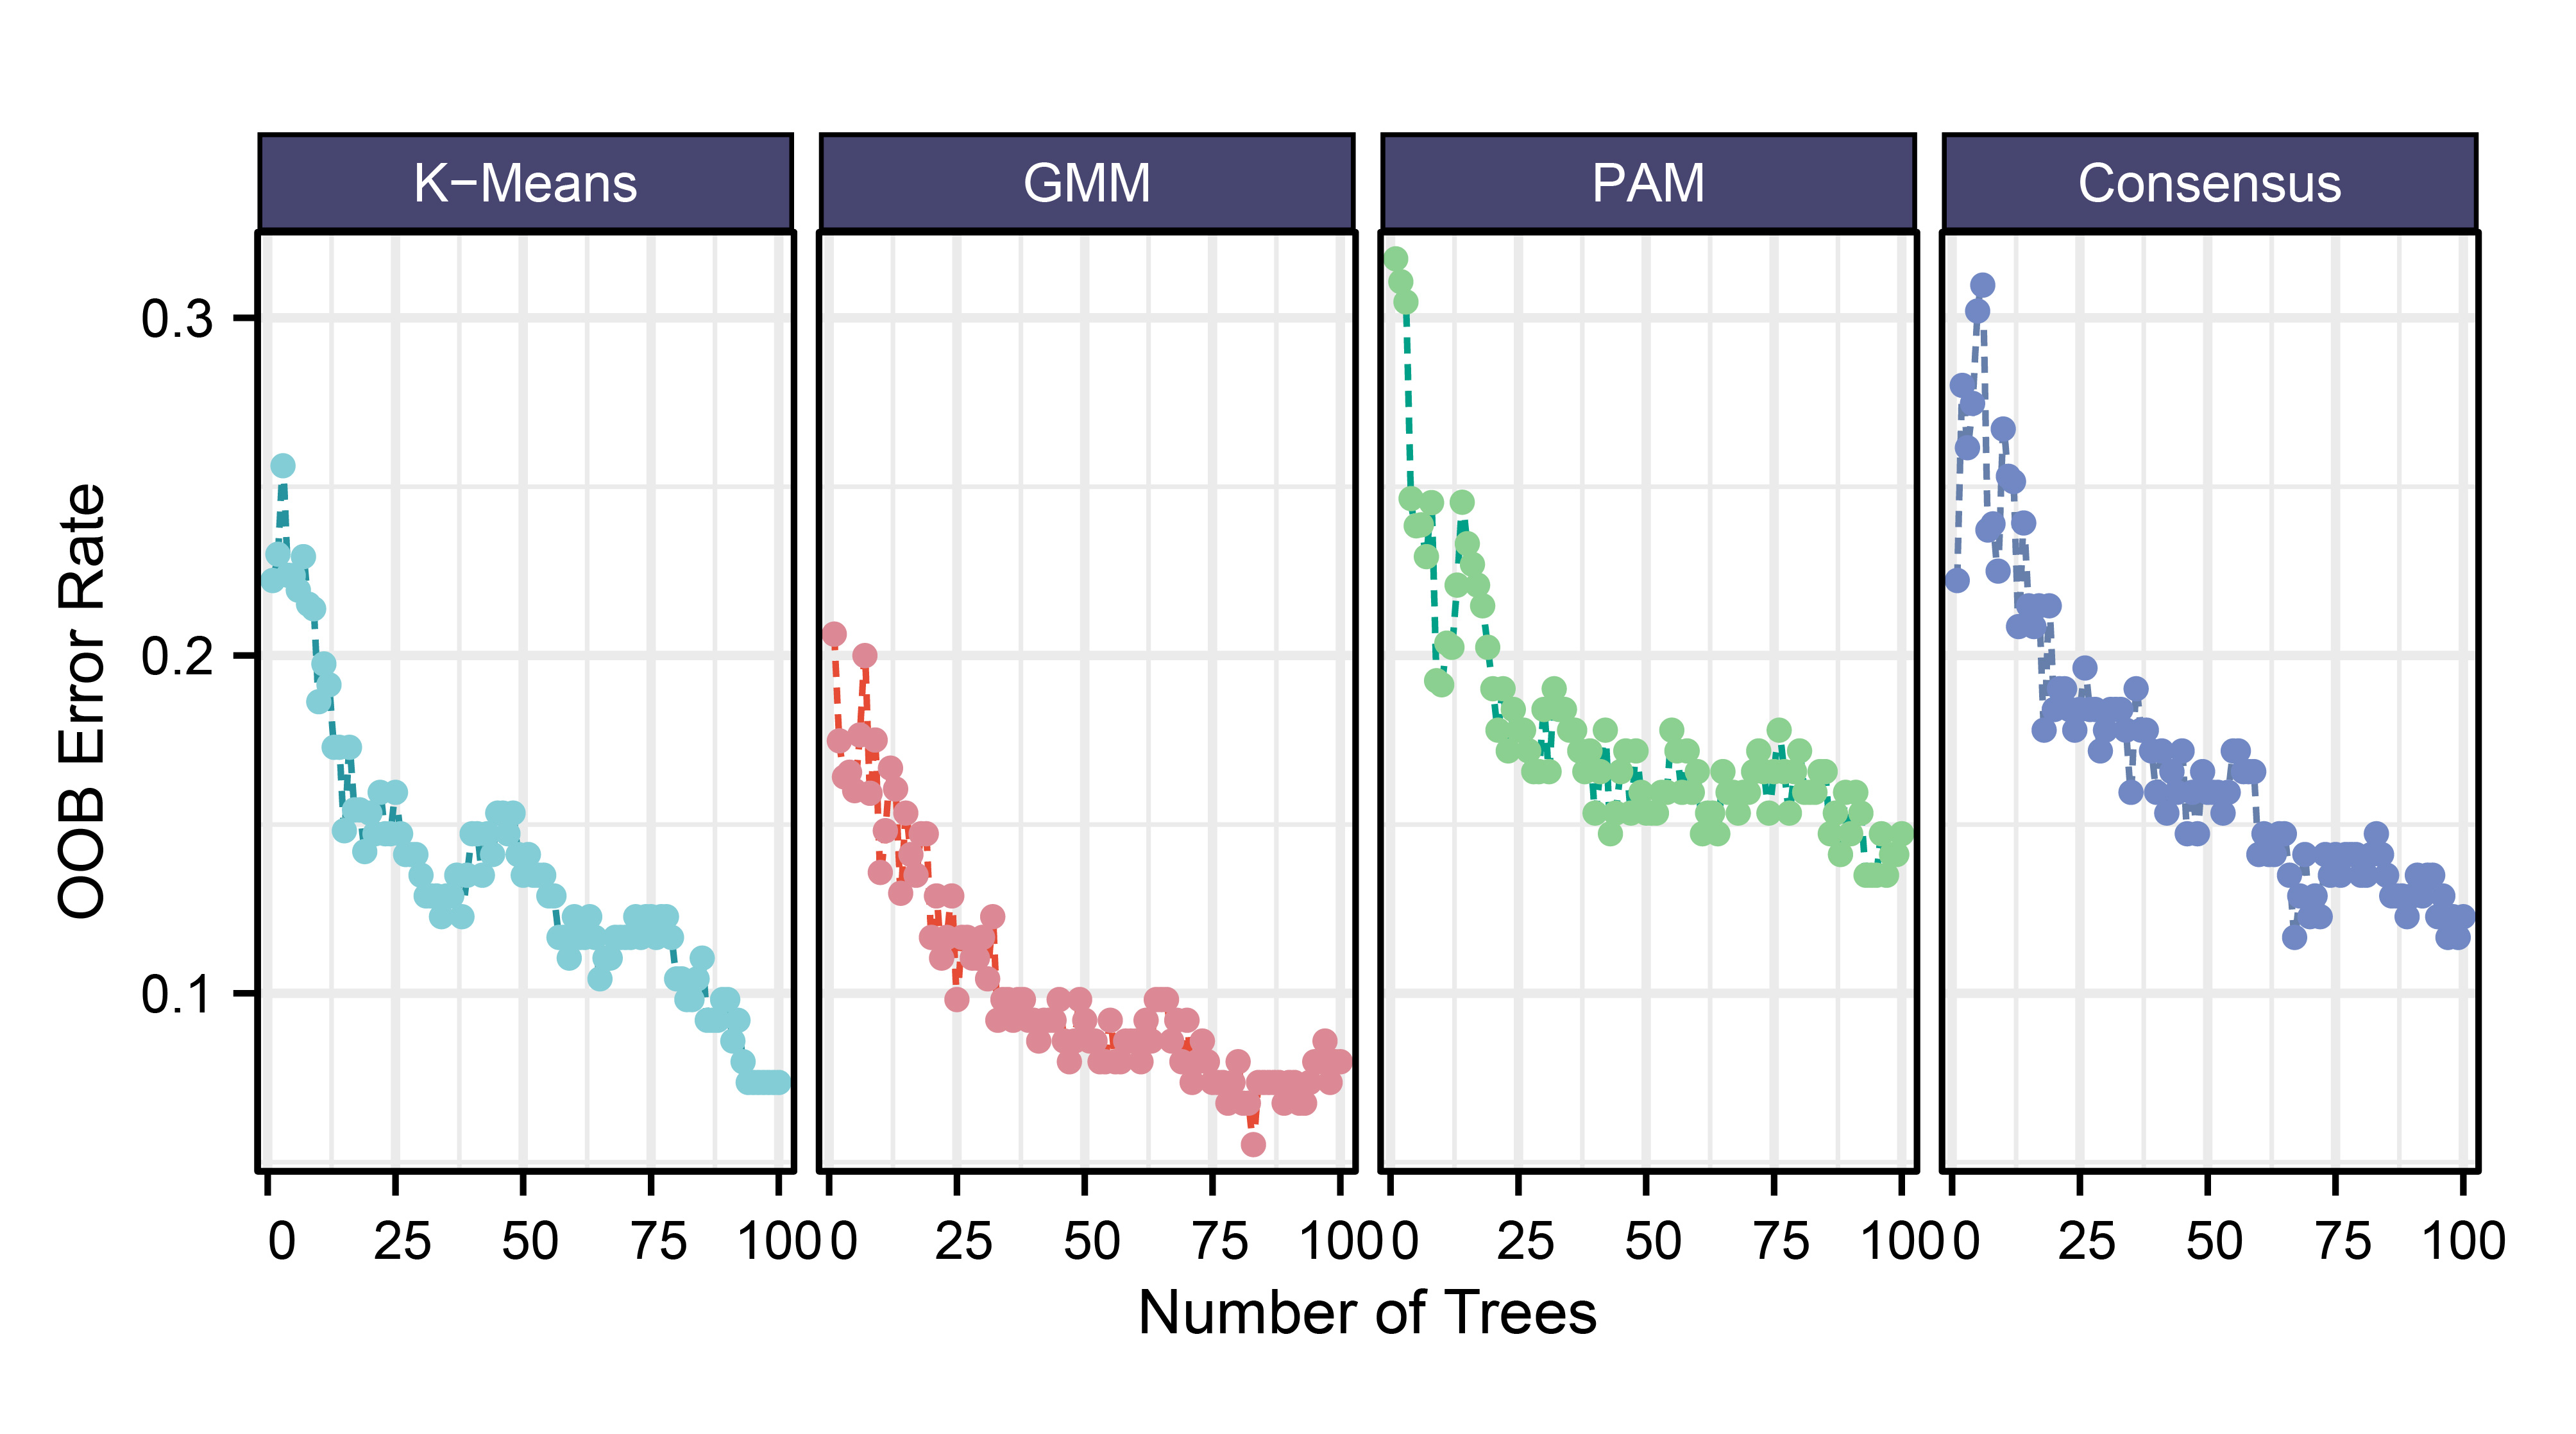


**Supplementary Figure 1. Comparison of clustering algorithms by Random Forest out-of-bag error rate.**

OOB error rate as a function of the number of trees for four clustering-informed Random Forest models: K-means, Gaussian mixture model (GMM), partitioning around medoids (PAM), and consensus clustering. Each point represents the mean error at a given tree count.

**Supplementary Figure 2. Clinical characteristics across the three metabolically defined clusters.**


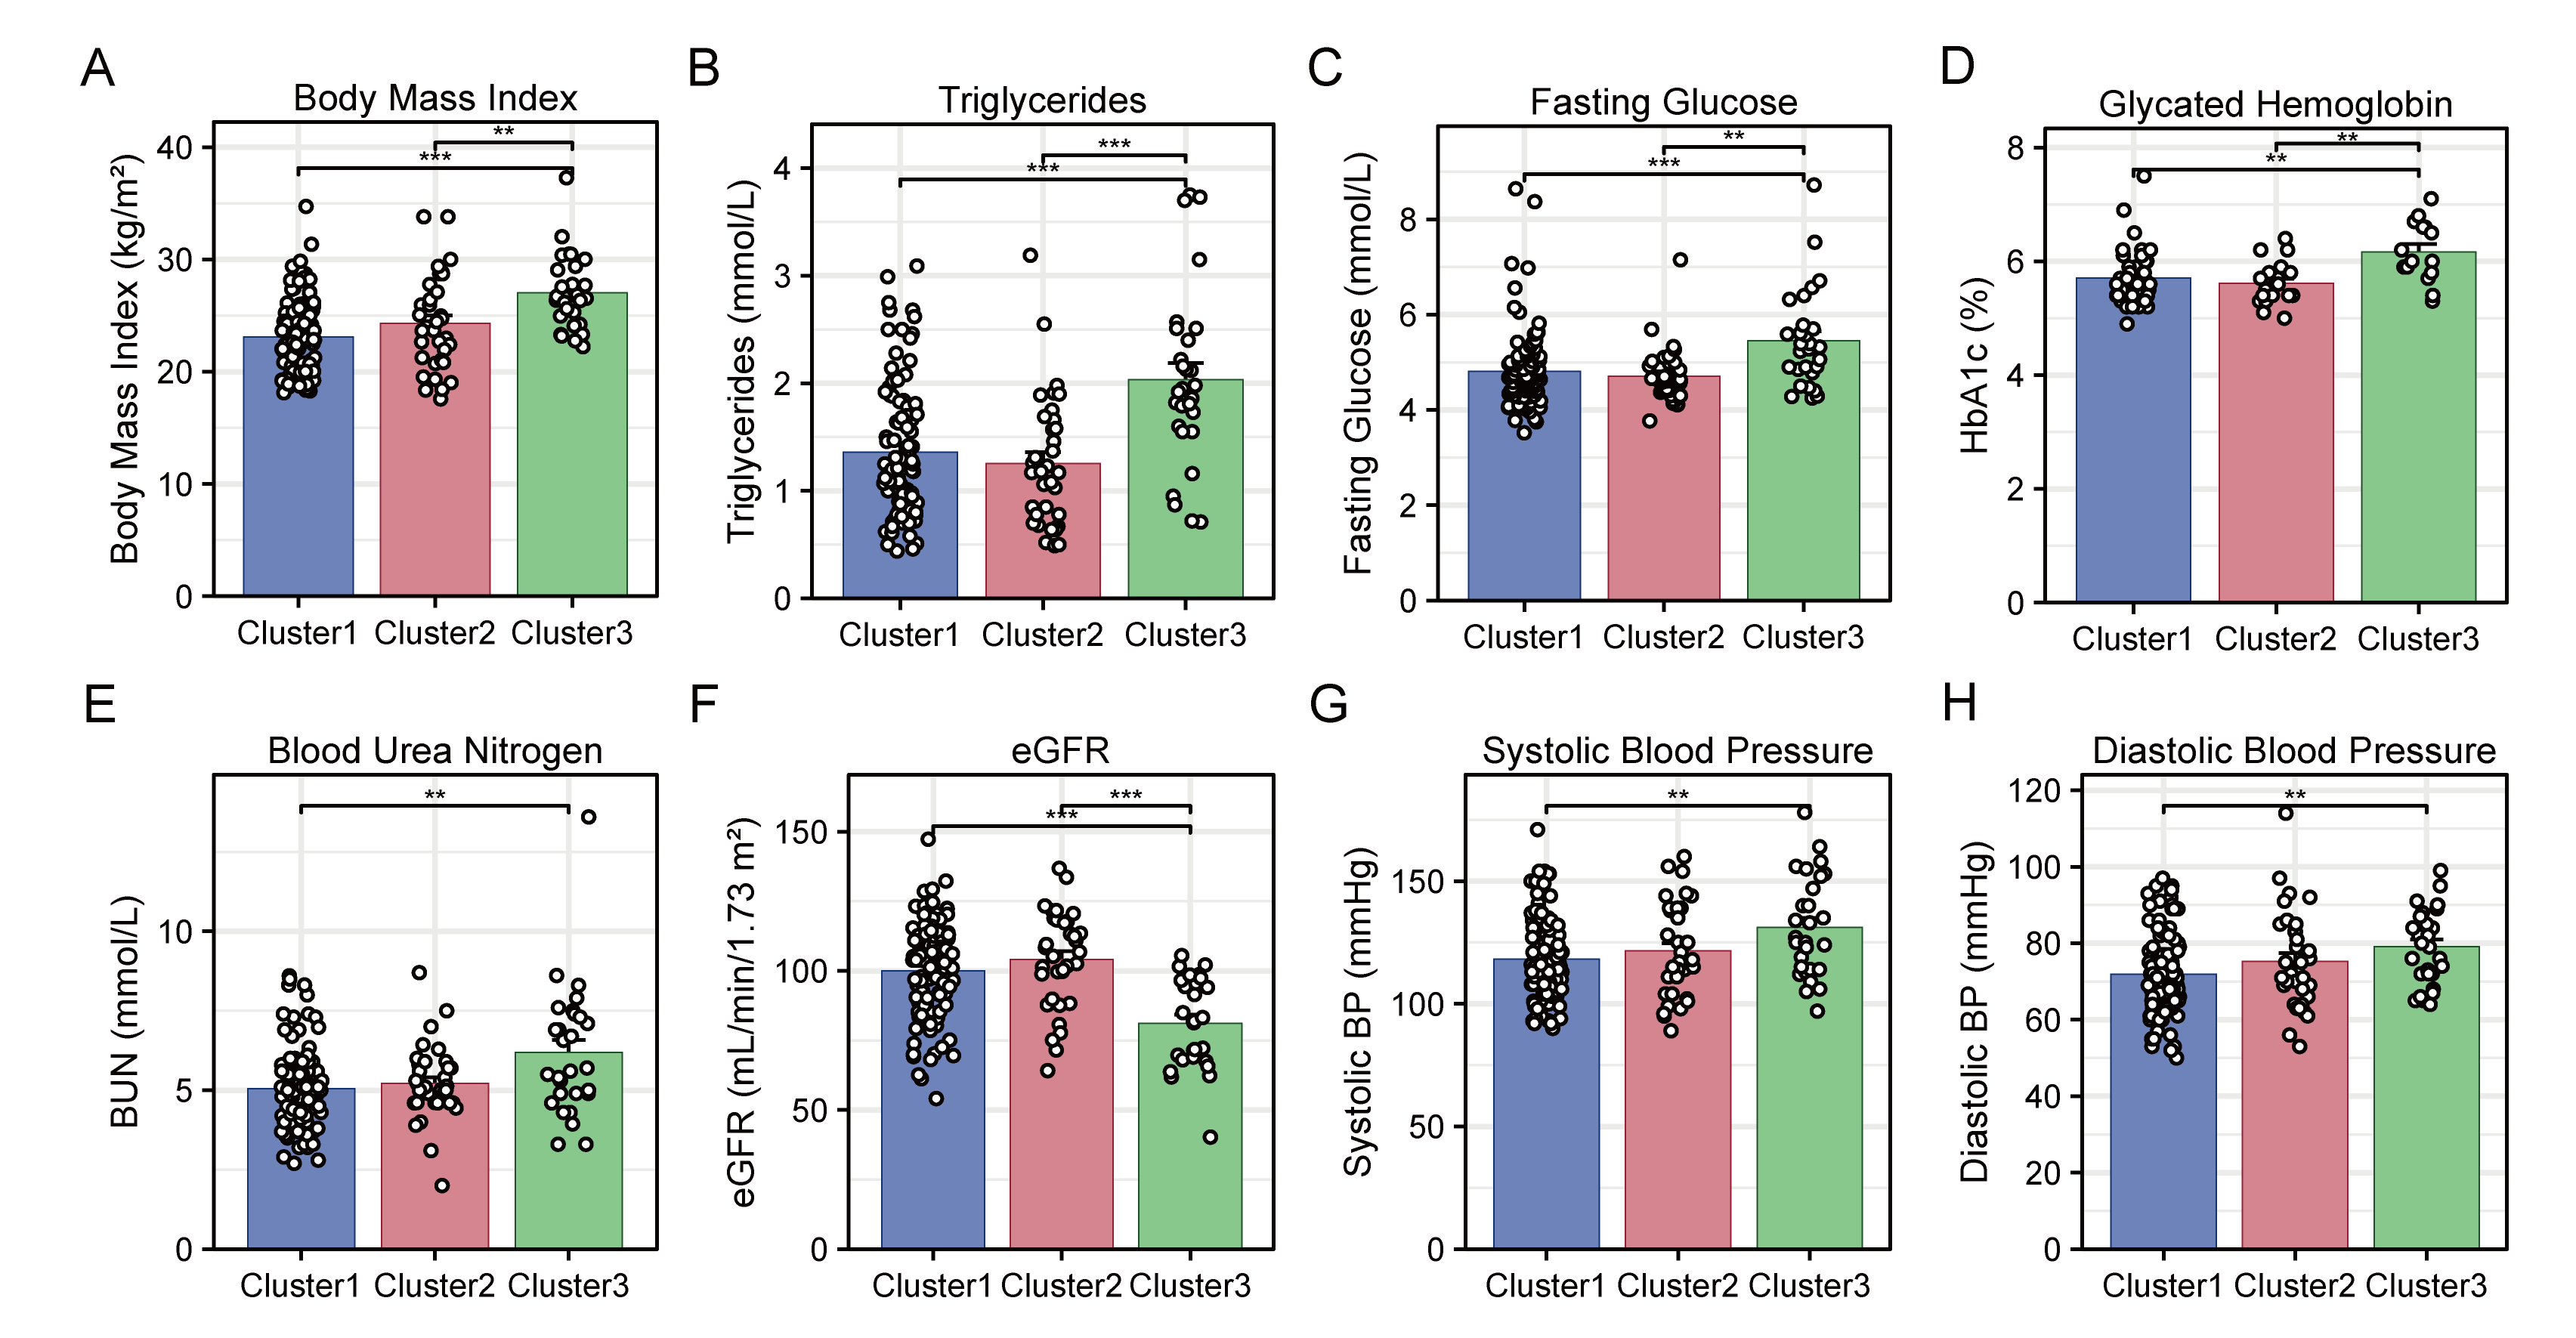


Bar plots show the distribution of representative CKM-related clinical indicators across Cluster 1, Cluster 2, and Cluster 3, including: (A) Body Mass Index (BMI), (B) Triglycerides (TG), (C) Fasting Glucose, (D) Glycated Hemoglobin (HbA1c), (E) Blood Urea Nitrogen (BUN), (F) Estimated Glomerular Filtration Rate (eGFR), (G) Systolic Blood Pressure (SBP), and (H) Diastolic Blood Pressure (DBP).

**Supplementary Figure 3. Classification performance of conventional clinical markers for CKM risk stratification.**


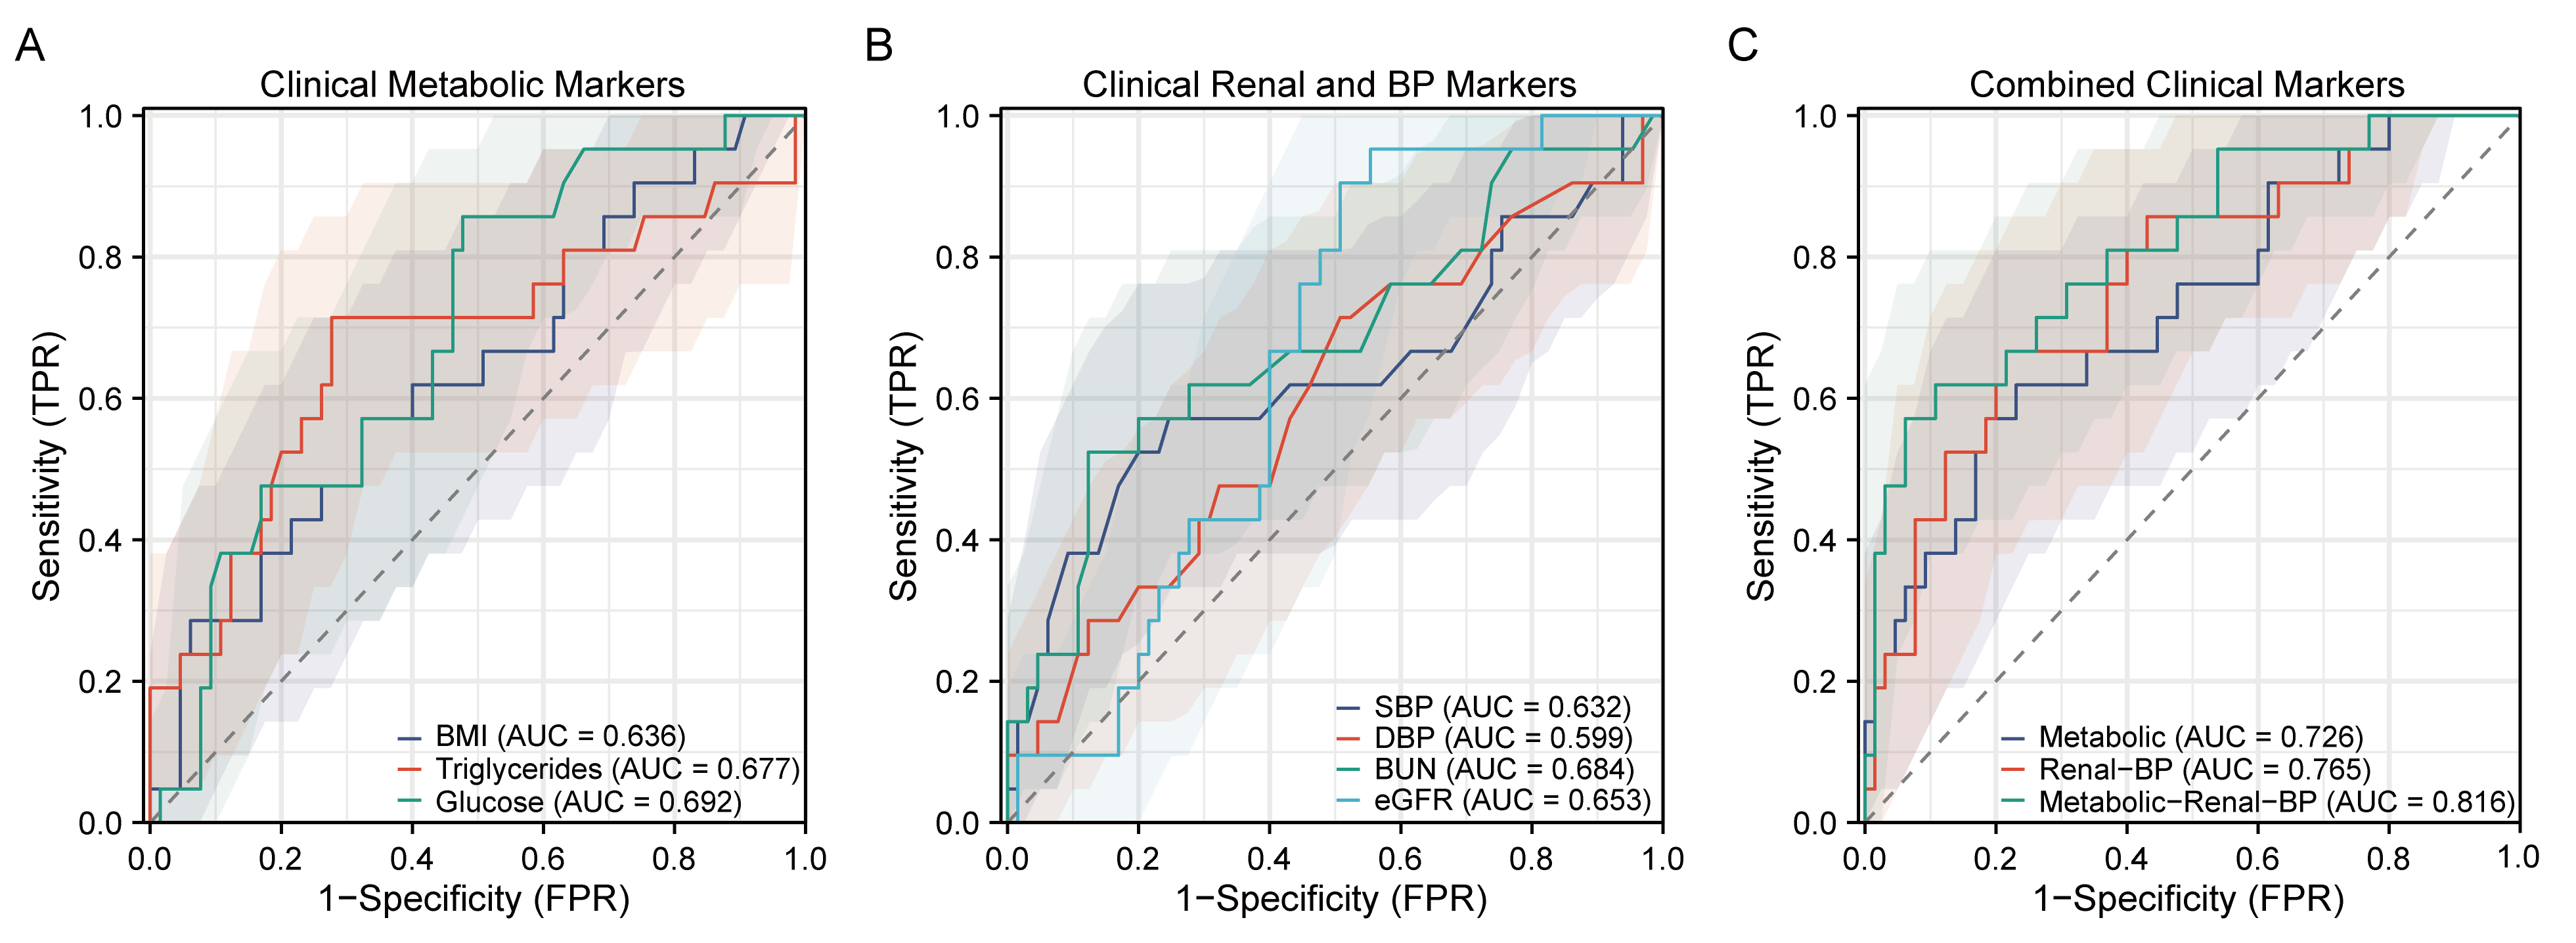


(A) ROC curves for individual metabolic indicators: body mass index (BMI), triglycerides, and glucose. (B) ROC curves for renal and blood pressure indicators: systolic blood pressure (SBP), diastolic blood pressure (DBP), blood urea nitrogen (BUN), and estimated glomerular filtration rate (eGFR). (C) ROC curves for combination models: metabolic markers (AUC = 0.726), renal-BP markers (AUC = 0.765), and combined metabolic + renal-BP model (AUC = 0.816).

Shaded areas represent 95% confidence intervals. TPR: true positive rate; FPR: false positive rate.


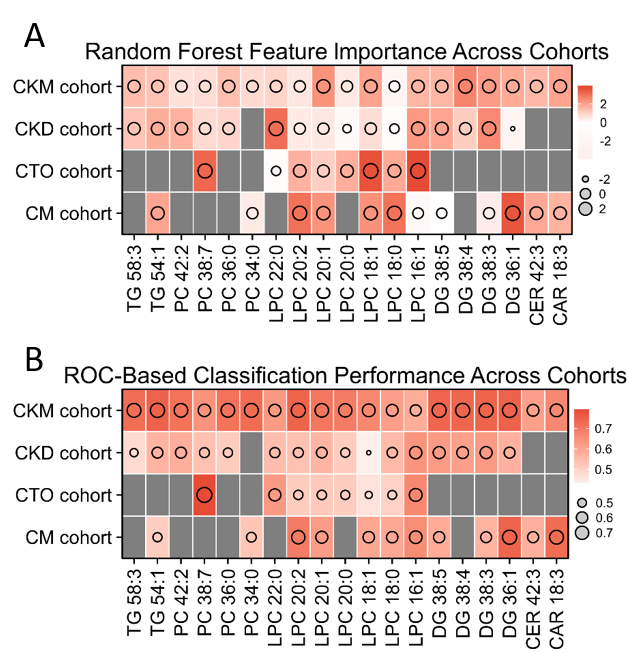


**Supplementary Figure 4. Cross-cohort validation of the CKM-associated metabolites using Random Forest feature importance and ROC-based classification performance.**

(A) Random Forest (RF) feature importance (MeanDecreaseAccuracy) of the CKM-characteristic metabolites across four cohorts: the discovery CKM cohort, and three validation cohorts: CKD cohort (ST000816, diabetic kidney disease), CTO cohort (ST003661, coronary artery chronic total occlusion), and CM cohort (ST003275, coronary microvascular disease).

(B) ROC-based classification performance of these CKM-associated metabolites in each cohort. Heat color intensity represents RF importance (A) or AUC values (B); circle size indicates the corresponding magnitude. Gray tiles indicate unavailable metabolites in the given cohort.

**Supplementary Table 1. Comparison of metabolite abundances among Cluster 1, 2, and 3 using one-way ANOVA.**

| **Metabolite** | **P_value** | **FDR** | **Significant**  **(FDR<0.05)** | **From**  **metabolomics** | **From**  **lipidomics** |
| --- | --- | --- | --- | --- | --- |
| Glutamine | 3.54E-38 | 1.38E-35 | TRUE | Yes |  |
| TG 56:6 | 4.38E-37 | 3.94E-35 | TRUE |  | Yes |
| TG 52:1 | 4.42E-37 | 3.94E-35 | TRUE |  | Yes |
| TG 58:6 | 5.05E-37 | 3.94E-35 | TRUE |  | Yes |
| TG 58:5 | 4.69E-37 | 3.94E-35 | TRUE |  | Yes |
| DG 38:5 | 2.00E-35 | 1.30E-33 | TRUE |  | Yes |
| TG 52:2 | 8.03E-34 | 4.47E-32 | TRUE |  | Yes |
| TG 56:5 | 2.58E-33 | 1.26E-31 | TRUE |  | Yes |
| TG 58:7 | 3.06E-33 | 1.33E-31 | TRUE |  | Yes |
| DG 36:1 | 4.02E-33 | 1.57E-31 | TRUE |  | Yes |
| DG 34:3 | 7.30E-33 | 2.59E-31 | TRUE |  | Yes |
| DG 38:4 | 1.02E-32 | 3.31E-31 | TRUE |  | Yes |
| TG 56:8 | 1.80E-32 | 5.39E-31 | TRUE |  | Yes |
| DG 34:2 | 2.22E-32 | 6.19E-31 | TRUE |  | Yes |
| TG 50:4 | 3.62E-32 | 9.41E-31 | TRUE |  | Yes |
| TG 51:4 | 7.68E-32 | 1.87E-30 | TRUE |  | Yes |
| CE 18:3 | 1.09E-31 | 2.50E-30 | TRUE |  | Yes |
| TG 60:9 | 1.81E-31 | 3.92E-30 | TRUE |  | Yes |
| TG 52:5 | 2.03E-31 | 4.16E-30 | TRUE |  | Yes |
| TG 60:8 | 4.53E-31 | 8.83E-30 | TRUE |  | Yes |
| DG 36:2 | 5.08E-31 | 9.43E-30 | TRUE |  | Yes |
| DG 36:3 | 6.85E-31 | 1.21E-29 | TRUE |  | Yes |
| TG 54:1 | 7.76E-31 | 1.32E-29 | TRUE |  | Yes |
| DG 40:7 | 9.93E-31 | 1.61E-29 | TRUE |  | Yes |
| TG 54:2 | 1.28E-30 | 1.99E-29 | TRUE |  | Yes |
| TG 56:4 | 1.68E-30 | 2.52E-29 | TRUE |  | Yes |
| TG 51:3 | 2.18E-30 | 3.14E-29 | TRUE |  | Yes |
| TG 50:2 | 4.47E-30 | 6.23E-29 | TRUE |  | Yes |
| TG 58:8 | 9.47E-30 | 1.27E-28 | TRUE |  | Yes |
| TG 50:0 | 1.55E-29 | 2.01E-28 | TRUE |  | Yes |
| TG 60:10 | 1.62E-29 | 2.04E-28 | TRUE |  | Yes |
| L-Glutamic acid | 2.10E-29 | 2.56E-28 | TRUE | Yes |  |
| DG 36:4 | 2.36E-29 | 2.79E-28 | TRUE |  | Yes |
| TG 52:3 | 3.42E-29 | 3.92E-28 | TRUE |  | Yes |
| DG 38:6 | 3.56E-29 | 3.97E-28 | TRUE |  | Yes |
| TG 50:3 | 4.63E-29 | 5.01E-28 | TRUE |  | Yes |
| TG 58:9 | 5.19E-29 | 5.47E-28 | TRUE |  | Yes |
| L-Tyrosine | 6.97E-29 | 7.15E-28 | TRUE | Yes |  |
| TG 52:6 | 9.80E-29 | 9.80E-28 | TRUE |  | Yes |
| TG 54:3 | 1.18E-28 | 1.16E-27 | TRUE |  | Yes |
| TG 52:4 | 1.70E-28 | 1.62E-27 | TRUE |  | Yes |
| TG 56:7 | 2.03E-28 | 1.89E-27 | TRUE |  | Yes |
| Phosphoric acid | 2.41E-28 | 2.19E-27 | TRUE | Yes |  |
| TG 56:3 | 3.08E-28 | 2.73E-27 | TRUE |  | Yes |
| TG 50:5 | 1.53E-27 | 1.33E-26 | TRUE |  | Yes |
| Penicillamine | 3.88E-27 | 3.29E-26 | TRUE | Yes |  |
| TG 54:5 | 4.23E-27 | 3.51E-26 | TRUE |  | Yes |
| TG 53:4 | 1.38E-26 | 1.12E-25 | TRUE |  | Yes |
| DG 34:0 | 2.46E-26 | 1.94E-25 | TRUE |  | Yes |
| DG 38:3 | 2.48E-26 | 1.94E-25 | TRUE |  | Yes |
| TG 54:4 | 4.27E-26 | 3.27E-25 | TRUE |  | Yes |
| TG 56:9 | 5.90E-26 | 4.43E-25 | TRUE |  | Yes |
| CE 18:2 | 1.09E-25 | 7.99E-25 | TRUE |  | Yes |
| TG 50:1 | 1.17E-25 | 8.47E-25 | TRUE |  | Yes |
| CE 18:1 | 2.91E-25 | 2.06E-24 | TRUE |  | Yes |
| DG 34:1 | 4.11E-25 | 2.86E-24 | TRUE |  | Yes |
| TG 53:3 | 5.19E-25 | 3.55E-24 | TRUE |  | Yes |
| TG 52:0 | 1.09E-24 | 7.31E-24 | TRUE |  | Yes |
| CE 16:1 | 3.86E-24 | 2.55E-23 | TRUE |  | Yes |
| TG 56:2 | 5.92E-24 | 3.85E-23 | TRUE |  | Yes |
| TG 58:10 | 9.10E-24 | 5.82E-23 | TRUE |  | Yes |
| CE 20:4 | 1.08E-23 | 6.80E-23 | TRUE |  | Yes |
| TG 52:7 | 1.50E-23 | 9.29E-23 | TRUE |  | Yes |
| TG 49:3 | 2.47E-23 | 1.51E-22 | TRUE |  | Yes |
| LPA 18:0 | 2.69E-23 | 1.61E-22 | TRUE | Yes | Yes |
| TG 51:2 | 1.37E-22 | 8.10E-22 | TRUE |  | Yes |
| TG 53:2 | 2.13E-22 | 1.24E-21 | TRUE |  | Yes |
| TG 48:3 | 4.30E-22 | 2.47E-21 | TRUE |  | Yes |
| DG 36:0 | 6.09E-22 | 3.44E-21 | TRUE |  | Yes |
| CE 22:6 | 7.14E-22 | 3.98E-21 | TRUE |  | Yes |
| TG 48:2 | 1.47E-21 | 8.08E-21 | TRUE |  | Yes |
| TG 54:8 | 1.79E-21 | 9.72E-21 | TRUE |  | Yes |
| LPA 16:0 | 3.20E-21 | 1.71E-20 | TRUE | Yes | Yes |
| CE 22:5 | 6.69E-21 | 3.53E-20 | TRUE |  | Yes |
| TG 48:1 | 1.56E-20 | 8.10E-20 | TRUE |  | Yes |
| TG 48:0 | 1.78E-20 | 9.15E-20 | TRUE |  | Yes |
| TG 54:6 | 2.40E-20 | 1.22E-19 | TRUE |  | Yes |
| TG 49:2 | 1.25E-19 | 6.24E-19 | TRUE |  | Yes |
| TG 58:4 | 3.97E-19 | 1.96E-18 | TRUE |  | Yes |
| LPC 16:0 | 1.56E-18 | 7.59E-18 | TRUE | Yes | Yes |
| LPC 14:1 | 1.62E-18 | 7.81E-18 | TRUE | Yes | Yes |
| Lactic acid | 1.82E-18 | 8.64E-18 | TRUE | Yes |  |
| TG 56:1 | 2.44E-18 | 1.15E-17 | TRUE |  | Yes |
| CE 20:3 | 3.41E-18 | 1.58E-17 | TRUE |  | Yes |
| Cer 38:1 | 4.79E-18 | 2.20E-17 | TRUE |  | Yes |
| DG 40:2 | 7.16E-18 | 3.25E-17 | TRUE |  | Yes |
| TG 55:3 | 7.62E-18 | 3.41E-17 | TRUE |  | Yes |
| TG 60:12 | 3.94E-17 | 1.75E-16 | TRUE |  | Yes |
| TG 40:1 | 4.30E-16 | 1.88E-15 | TRUE |  | Yes |
| TG 54:7 | 5.20E-16 | 2.25E-15 | TRUE |  | Yes |
| TG 55:2 | 5.82E-16 | 2.50E-15 | TRUE |  | Yes |
| SM 38:1 | 1.35E-15 | 5.71E-15 | TRUE | Yes | Yes |
| 16-OH-C16:0 | 9.44E-15 | 3.96E-14 | TRUE |  |  |
| TG 56:10 | 9.92E-15 | 4.12E-14 | TRUE |  | Yes |
| PC 40:4 | 1.12E-14 | 4.61E-14 | TRUE | Yes | Yes |
| TG 49:1 | 1.25E-14 | 5.09E-14 | TRUE |  | Yes |
| TG 51:1 | 1.47E-14 | 5.92E-14 | TRUE |  | Yes |
| TG 44:2 | 2.04E-14 | 8.13E-14 | TRUE |  | Yes |
| AOZ | 5.22E-14 | 2.06E-13 | TRUE |  | Yes |
| TG 46:0 | 5.52E-14 | 2.15E-13 | TRUE |  | Yes |
| PE 38:3 | 6.67E-14 | 2.57E-13 | TRUE |  | Yes |
| CE 20:5 | 7.42E-14 | 2.84E-13 | TRUE |  | Yes |
| Cer 32:1 | 1.84E-13 | 6.99E-13 | TRUE |  | Yes |
| Cholesterol sulfate | 2.36E-13 | 8.87E-13 | TRUE | Yes |  |
| LPA 18:1 | 3.08E-13 | 1.15E-12 | TRUE | Yes |  |
| FA 24:1 | 8.85E-13 | 3.26E-12 | TRUE |  | Yes |
| FA 20:3 | 9.82E-13 | 3.58E-12 | TRUE | Yes | Yes |
| DG 38:1 | 1.12E-12 | 4.05E-12 | TRUE |  | Yes |
| FA 16:0 | 1.25E-12 | 4.46E-12 | TRUE | Yes | Yes |
| Cer 34:2 | 1.35E-12 | 4.80E-12 | TRUE |  | Yes |
| TG 55:5 | 1.61E-12 | 5.67E-12 | TRUE |  | Yes |
| TG 47:2 | 2.97E-12 | 1.04E-11 | TRUE |  | Yes |
| Cer 38:2 | 3.23E-12 | 1.12E-11 | TRUE |  | Yes |
| TG 46:2 | 3.52E-12 | 1.20E-11 | TRUE |  | Yes |
| FA 18:1 | 3.78E-12 | 1.28E-11 | TRUE | Yes | Yes |
| Lys | 4.15E-12 | 1.40E-11 | TRUE | Yes |  |
| CE 18:0 | 5.06E-12 | 1.69E-11 | TRUE |  | Yes |
| Cer 42:0 | 9.46E-12 | 3.13E-11 | TRUE |  | Yes |
| FA 20:1 | 1.19E-11 | 3.89E-11 | TRUE | Yes | Yes |
| FA 19:1 | 1.98E-11 | 6.45E-11 | TRUE |  | Yes |
| TG 62:13 | 2.02E-11 | 6.52E-11 | TRUE |  | Yes |
| PC 32:0 | 2.34E-11 | 7.48E-11 | TRUE | Yes | Yes |
| FA 22:4 | 2.45E-11 | 7.76E-11 | TRUE |  | Yes |
| PC 34:1 | 2.62E-11 | 8.24E-11 | TRUE | Yes | Yes |
| FA 22:5 | 2.76E-11 | 8.60E-11 | TRUE | Yes | Yes |
| TG 46:1 | 2.85E-11 | 8.81E-11 | TRUE |  | Yes |
| SM 32:0 | 3.05E-11 | 9.35E-11 | TRUE |  | Yes |
| PC 38:3 | 3.37E-11 | 1.02E-10 | TRUE | Yes | Yes |
| PC 38:1 | 3.35E-11 | 1.02E-10 | TRUE |  | Yes |
| TG 47:1 | 3.68E-11 | 1.10E-10 | TRUE |  | Yes |
| FA 16:1 | 3.90E-11 | 1.16E-10 | TRUE | Yes | Yes |
| PC 36:1 | 3.94E-11 | 1.16E-10 | TRUE | Yes | Yes |
| FA 20:4 | 5.19E-11 | 1.52E-10 | TRUE | Yes | Yes |
| PC 42:9 | 8.83E-11 | 2.57E-10 | TRUE |  | Yes |
| PC 42:7 | 9.23E-11 | 2.67E-10 | TRUE |  | Yes |
| PC 32:1 | 1.06E-10 | 3.03E-10 | TRUE | Yes | Yes |
| FA 20:2 | 1.69E-10 | 4.82E-10 | TRUE | Yes | Yes |
| FA 22:6 | 1.73E-10 | 4.89E-10 | TRUE | Yes | Yes |
| Cer 41:1 | 2.42E-10 | 6.80E-10 | TRUE |  | Yes |
| PC 36:0 | 2.47E-10 | 6.83E-10 | TRUE |  | Yes |
| PE 40:6 | 2.46E-10 | 6.83E-10 | TRUE |  | Yes |
| Cer 36:1 | 3.06E-10 | 8.41E-10 | TRUE |  | Yes |
| FA 18:0 | 3.11E-10 | 8.48E-10 | TRUE |  | Yes |
| Cer 42:1 | 3.17E-10 | 8.60E-10 | TRUE |  | Yes |
| Cer 40:1 | 3.63E-10 | 9.77E-10 | TRUE |  | Yes |
| PC 36:3 | 3.79E-10 | 1.00E-09 | TRUE | Yes | Yes |
| FA 14:0 | 3.77E-10 | 1.00E-09 | TRUE | Yes | Yes |
| FA 18:2 | 5.18E-10 | 1.37E-09 | TRUE | Yes | Yes |
| PC 38:2 | 7.66E-10 | 2.01E-09 | TRUE |  | Yes |
| SM 36:2 | 1.06E-09 | 2.76E-09 | TRUE | Yes | Yes |
| SM 36:0 | 1.21E-09 | 3.12E-09 | TRUE |  | Yes |
| Cer 44:3 | 1.34E-09 | 3.43E-09 | TRUE |  | Yes |
| SM 34:2 | 1.51E-09 | 3.84E-09 | TRUE | Yes | Yes |
| PC 42:6 | 1.56E-09 | 3.95E-09 | TRUE |  | Yes |
| PC 34:0 | 1.67E-09 | 4.17E-09 | TRUE |  | Yes |
| FA 22:2 | 1.67E-09 | 4.17E-09 | TRUE |  | Yes |
| TG 58:11 | 1.72E-09 | 4.28E-09 | TRUE |  | Yes |
| FA 16:2 | 1.88E-09 | 4.65E-09 | TRUE | Yes | Yes |
| SM 40:2 | 1.96E-09 | 4.82E-09 | TRUE | Yes | Yes |
| PE 38:6 | 1.99E-09 | 4.86E-09 | TRUE | Yes | Yes |
| PC 40:5 | 3.18E-09 | 7.70E-09 | TRUE | Yes | Yes |
| FA 19:0 | 3.47E-09 | 8.34E-09 | TRUE | Yes | Yes |
| PE 34:1 | 4.42E-09 | 1.06E-08 | TRUE |  | Yes |
| TG 44:1 | 5.04E-09 | 1.20E-08 | TRUE |  | Yes |
| FA 18:4 | 5.70E-09 | 1.35E-08 | TRUE |  | Yes |
| PC 36:4 | 6.67E-09 | 1.57E-08 | TRUE | Yes | Yes |
| FA 20:5 | 7.41E-09 | 1.73E-08 | TRUE | Yes | Yes |
| TG 58:3 | 8.54E-09 | 1.98E-08 | TRUE |  | Yes |
| SM 32:1 | 1.18E-08 | 2.73E-08 | TRUE | Yes | Yes |
| FA 17:0 | 1.32E-08 | 3.02E-08 | TRUE | Yes | Yes |
| SM 36:4 | 1.49E-08 | 3.40E-08 | TRUE |  | Yes |
| L-Glutamine | 1.51E-08 | 3.42E-08 | TRUE | Yes |  |
| PE 38:4 | 1.61E-08 | 3.64E-08 | TRUE |  | Yes |
| PC 42:8 | 2.08E-08 | 4.66E-08 | TRUE |  | Yes |
| Cer 42:3 | 2.13E-08 | 4.74E-08 | TRUE |  | Yes |
| Cer 43:2 | 2.36E-08 | 5.24E-08 | TRUE |  | Yes |
| PE 36:2 | 2.46E-08 | 5.43E-08 | TRUE |  | Yes |
| FA 17:1 | 2.51E-08 | 5.49E-08 | TRUE | Yes | Yes |
| D?Pip | 2.63E-08 | 5.73E-08 | TRUE |  | Yes |
| PE 37:4 | 3.85E-08 | 8.34E-08 | TRUE |  | Yes |
| PE 36:4 | 5.87E-08 | 1.27E-07 | TRUE | Yes | Yes |
| PC 42:5 | 7.65E-08 | 1.64E-07 | TRUE |  | Yes |
| TG 58:2 | 7.96E-08 | 1.70E-07 | TRUE |  | Yes |
| Cer 40:2 | 8.33E-08 | 1.77E-07 | TRUE |  | Yes |
| Met | 8.51E-08 | 1.79E-07 | TRUE | Yes |  |
| TG 44:0 | 1.34E-07 | 2.81E-07 | TRUE |  | Yes |
| PC 38:6 | 1.49E-07 | 3.11E-07 | TRUE | Yes | Yes |
| HexCer 38:1 | 1.54E-07 | 3.20E-07 | TRUE |  | Yes |
| FA 14:1 | 1.70E-07 | 3.50E-07 | TRUE | Yes | Yes |
| Lolitriol | 2.53E-07 | 5.19E-07 | TRUE | Yes |  |
| SM 36:1 | 2.62E-07 | 5.33E-07 | TRUE | Yes | Yes |
| 2-OH-C14:0 | 2.62E-07 | 5.33E-07 | TRUE |  |  |
| PE 36:5 | 3.55E-07 | 7.17E-07 | TRUE |  | Yes |
| FA 20:0 | 3.70E-07 | 7.44E-07 | TRUE | Yes | Yes |
| PC 42:11 | 4.24E-07 | 8.48E-07 | TRUE |  | Yes |
| FA 18:3 | 6.16E-07 | 1.23E-06 | TRUE | Yes | Yes |
| SM 34:0 | 8.28E-07 | 1.64E-06 | TRUE | Yes | Yes |
| PC 37:4 | 9.28E-07 | 1.83E-06 | TRUE |  | Yes |
| CAR 18:0 | 1.17E-06 | 2.30E-06 | TRUE | Yes | Yes |
| PE 34:2 | 1.24E-06 | 2.41E-06 | TRUE | Yes | Yes |
| 13-KODA | 1.63E-06 | 3.17E-06 | TRUE | Yes |  |
| Leu | 1.68E-06 | 3.24E-06 | TRUE | Yes |  |
| CAR 16:0 | 1.85E-06 | 3.55E-06 | TRUE | Yes | Yes |
| SM 44:2 | 2.47E-06 | 4.72E-06 | TRUE |  | Yes |
| FA 22:0 | 2.49E-06 | 4.74E-06 | TRUE | Yes | Yes |
| Cholesterol | 2.73E-06 | 5.16E-06 | TRUE | Yes |  |
| PC 36:5 | 3.29E-06 | 6.19E-06 | TRUE | Yes | Yes |
| FA 10:0 | 4.99E-06 | 9.35E-06 | TRUE | Yes | Yes |
| PCho | 5.69E-06 | 1.06E-05 | TRUE |  | Yes |
| SM 41:3 | 6.84E-06 | 1.27E-05 | TRUE |  | Yes |
| SM 39:1 | 7.68E-06 | 1.42E-05 | TRUE |  | Yes |
| Betaine | 8.13E-06 | 1.50E-05 | TRUE | Yes |  |
| CAR 14:0 | 8.27E-06 | 1.51E-05 | TRUE | Yes | Yes |
| FA 24:0 | 8.55E-06 | 1.56E-05 | TRUE |  | Yes |
| Choline | 8.75E-06 | 1.59E-05 | TRUE | Yes |  |
| Leu-Leu | 1.02E-05 | 1.84E-05 | TRUE | Yes |  |
| FA 24:6 | 1.26E-05 | 2.27E-05 | TRUE | Yes | Yes |
| Val | 1.34E-05 | 2.40E-05 | TRUE | Yes |  |
| PC 36:2 | 1.36E-05 | 2.43E-05 | TRUE | Yes | Yes |
| Octylamine | 1.40E-05 | 2.49E-05 | TRUE | Yes |  |
| Cer 42:4 | 1.54E-05 | 2.72E-05 | TRUE |  | Yes |
| LPC 26:0 | 1.60E-05 | 2.81E-05 | TRUE |  | Yes |
| SM 39:2 | 2.07E-05 | 3.62E-05 | TRUE |  | Yes |
| N?Hep?Gly | 2.11E-05 | 3.68E-05 | TRUE | Yes |  |
| PC 40:8 | 2.45E-05 | 4.25E-05 | TRUE | Yes | Yes |
| FA 12:0 | 2.69E-05 | 4.64E-05 | TRUE | Yes | Yes |
| PC 31:1 | 2.75E-05 | 4.73E-05 | TRUE |  | Yes |
| 1-Hexadecanol | 2.95E-05 | 5.05E-05 | TRUE | Yes |  |
| PC 34:3 | 3.10E-05 | 5.27E-05 | TRUE | Yes | Yes |
| PAc | 3.64E-05 | 6.18E-05 | TRUE | Yes |  |
| FA 25:0 | 3.73E-05 | 6.30E-05 | TRUE |  | Yes |
| PC 34:4 | 4.16E-05 | 7.00E-05 | TRUE | Yes | Yes |
| FA 22:1 | 4.79E-05 | 8.01E-05 | TRUE | Yes | Yes |
| TG 62:14 | 5.70E-05 | 9.51E-05 | TRUE |  | Yes |
| Cer 42:2 | 6.67E-05 | 1.11E-04 | TRUE |  | Yes |
| FA 15:0 | 7.08E-05 | 1.17E-04 | TRUE | Yes | Yes |
| SM 42:2 | 8.40E-05 | 1.38E-04 | TRUE |  | Yes |
| FA 26:0 | 8.60E-05 | 1.41E-04 | TRUE |  | Yes |
| HexCer 42:2 | 1.13E-04 | 1.84E-04 | TRUE |  | Yes |
| PE 37:5 | 1.14E-04 | 1.86E-04 | TRUE |  | Yes |
| SM 33:1 | 1.24E-04 | 2.01E-04 | TRUE | Yes | Yes |
| SM 42:1 | 1.32E-04 | 2.13E-04 | TRUE |  | Yes |
| CAR 16:1 | 1.43E-04 | 2.29E-04 | TRUE | Yes | Yes |
| LPA 20:4 | 1.44E-04 | 2.29E-04 | TRUE | Yes | Yes |
| Cer 41:2 | 1.76E-04 | 2.80E-04 | TRUE |  | Yes |
| PC 40:6 | 1.90E-04 | 3.01E-04 | TRUE | Yes | Yes |
| SM 35:0 | 3.24E-04 | 5.12E-04 | TRUE |  | Yes |
| LPC 18:3 | 3.52E-04 | 5.54E-04 | TRUE | Yes | Yes |
| SM 40:4 | 3.60E-04 | 5.63E-04 | TRUE |  | Yes |
| PE 37:3 | 3.71E-04 | 5.79E-04 | TRUE |  | Yes |
| Cer 44:1 | 4.09E-04 | 6.36E-04 | TRUE |  | Yes |
| HexCer 40:2 | 4.26E-04 | 6.59E-04 | TRUE |  | Yes |
| N?Und?Gly | 4.74E-04 | 7.31E-04 | TRUE |  |  |
| LPA 20:2 | 5.43E-04 | 8.33E-04 | TRUE | Yes | Yes |
| PC 40:2 | 6.11E-04 | 9.35E-04 | TRUE |  | Yes |
| PE 36:0 | 6.51E-04 | 9.92E-04 | TRUE |  | Yes |
| PC 42:10 | 7.13E-04 | 1.08E-03 | TRUE | Yes | Yes |
| Cer 34:1 | 7.58E-04 | 1.15E-03 | TRUE |  | Yes |
| LPC 16:1 | 7.84E-04 | 1.18E-03 | TRUE | Yes | Yes |
| PC 38:5 | 7.87E-04 | 1.18E-03 | TRUE | Yes | Yes |
| PE 40:7 | 8.19E-04 | 1.22E-03 | TRUE |  | Yes |
| SM 36:3 | 8.58E-04 | 1.28E-03 | TRUE |  | Yes |
| CAR 14:1 | 9.95E-04 | 1.48E-03 | TRUE | Yes | Yes |
| PC 37:3 | 1.00E-03 | 1.48E-03 | TRUE | Yes | Yes |
| SM 40:1 | 1.30E-03 | 1.92E-03 | TRUE |  | Yes |
| Bilirubin | 1.36E-03 | 2.00E-03 | TRUE | Yes |  |
| CAR 16:2 | 1.52E-03 | 2.21E-03 | TRUE | Yes | Yes |
| PE 39:6 | 1.87E-03 | 2.73E-03 | TRUE |  | Yes |
| FA 15:1 | 1.92E-03 | 2.78E-03 | TRUE |  | Yes |
| CAR 12:0 | 2.19E-03 | 3.16E-03 | TRUE | Yes |  |
| PC 38:4 | 2.19E-03 | 3.16E-03 | TRUE | Yes | Yes |
| PEA | 2.21E-03 | 3.16E-03 | TRUE |  | Yes |
| SEA | 2.67E-03 | 3.82E-03 | TRUE |  | Yes |
| SM 38:4 | 2.72E-03 | 3.87E-03 | TRUE |  | Yes |
| SM 35:2 | 2.77E-03 | 3.93E-03 | TRUE |  | Yes |
| SM 34:1 | 3.13E-03 | 4.42E-03 | TRUE | Yes | Yes |
| Hex2Cer 42:2 | 3.18E-03 | 4.48E-03 | TRUE |  | Yes |
| PE 40:4 | 3.29E-03 | 4.62E-03 | TRUE | Yes | Yes |
| Lenticin | 3.57E-03 | 4.99E-03 | TRUE | Yes |  |
| PC 35:4 | 3.67E-03 | 5.11E-03 | TRUE | Yes | Yes |
| PC 33:1 | 3.71E-03 | 5.15E-03 | TRUE | Yes | Yes |
| SM 40:3 | 3.95E-03 | 5.46E-03 | TRUE |  | Yes |
| PC 35:3 | 4.08E-03 | 5.62E-03 | TRUE | Yes | Yes |
| CAR 18:3 | 4.19E-03 | 5.75E-03 | TRUE | Yes | Yes |
| SM 38:2 | 4.63E-03 | 6.34E-03 | TRUE |  | Yes |
| Farnesylacetone | 5.01E-03 | 6.83E-03 | TRUE | Yes |  |
| CAR 2:0 | 5.20E-03 | 7.06E-03 | TRUE | Yes |  |
| HexCer 42:1 | 5.35E-03 | 7.24E-03 | TRUE |  | Yes |
| PC 37:6 | 5.39E-03 | 7.28E-03 | TRUE |  | Yes |
| SM 41:1 | 5.89E-03 | 7.92E-03 | TRUE |  | Yes |
| CAR 14:2 | 6.46E-03 | 8.66E-03 | TRUE | Yes |  |
| SM 41:2 | 7.02E-03 | 9.38E-03 | TRUE | Yes | Yes |
| Hex2Cer 34:1 | 9.82E-03 | 1.31E-02 | TRUE |  | Yes |
| PC 30:1 | 1.10E-02 | 1.46E-02 | TRUE |  | Yes |
| PC 35:1 | 1.18E-02 | 1.56E-02 | TRUE | Yes | Yes |
| LPC 14:0 | 1.18E-02 | 1.56E-02 | TRUE | Yes | Yes |
| SM 42:3 | 1.28E-02 | 1.69E-02 | TRUE | Yes | Yes |
| HexCer 34:1 | 1.37E-02 | 1.79E-02 | TRUE |  | Yes |
| PE 38:5 | 1.41E-02 | 1.84E-02 | TRUE |  | Yes |
| PC 34:5 | 1.47E-02 | 1.91E-02 | TRUE |  | Yes |
| PC 38:7 | 1.55E-02 | 2.01E-02 | TRUE | Yes | Yes |
| LPC 24:0 | 1.62E-02 | 2.09E-02 | TRUE | Yes | Yes |
| PC 32:2 | 1.73E-02 | 2.22E-02 | TRUE | Yes | Yes |
| SM d18:1/18:0 | 1.76E-02 | 2.25E-02 | TRUE |  | Yes |
| Sphingosine | 1.86E-02 | 2.38E-02 | TRUE | Yes | Yes |
| PC 40:7 | 2.06E-02 | 2.63E-02 | TRUE | Yes | Yes |
| Cer 43:1 | 2.19E-02 | 2.78E-02 | TRUE |  | Yes |
| LPC 22:6 | 2.47E-02 | 3.13E-02 | TRUE | Yes | Yes |
| Pip-2-one | 2.78E-02 | 3.50E-02 | TRUE |  |  |
| PC 35:2 | 2.87E-02 | 3.61E-02 | TRUE | Yes | Yes |
| PE 36:3 | 2.90E-02 | 3.64E-02 | TRUE |  | Yes |
| HexCer 40:1 | 3.37E-02 | 4.22E-02 | TRUE |  | Yes |
| SM 35:1 | 3.76E-02 | 4.69E-02 | TRUE |  | Yes |
| CAR 18:1 | 4.24E-02 | 5.27E-02 | FALSE | Yes | Yes |
| Glu-Leu | 4.43E-02 | 5.48E-02 | FALSE | Yes |  |
| LPC 22:1 | 5.03E-02 | 6.20E-02 | FALSE |  | Yes |
| CAR 18:2 | 5.18E-02 | 6.37E-02 | FALSE | Yes | Yes |
| Leu-Pro | 5.73E-02 | 7.02E-02 | FALSE | Yes |  |
| SM 43:1 | 5.84E-02 | 7.14E-02 | FALSE |  | Yes |
| PC 42:2 | 5.95E-02 | 7.25E-02 | FALSE |  | Yes |
| CAR 22:1 | 6.06E-02 | 7.36E-02 | FALSE |  | Yes |
| HexCer 41:1 | 6.12E-02 | 7.41E-02 | FALSE |  | Yes |
| PE 38:2 | 6.16E-02 | 7.44E-02 | FALSE |  | Yes |
| CAR 12:1 | 6.81E-02 | 8.20E-02 | FALSE | Yes |  |
| SM 43:2 | 6.85E-02 | 8.22E-02 | FALSE |  | Yes |
| LPC 18:0 | 8.05E-02 | 9.63E-02 | FALSE | Yes | Yes |
| LPC 18:2 | 8.19E-02 | 9.76E-02 | FALSE | Yes | Yes |
| SM 44:1 | 8.44E-02 | 1.00E-01 | FALSE |  | Yes |
| Cepanone | 8.63E-02 | 1.02E-01 | FALSE | Yes |  |
| CAR 12:3 | 9.14E-02 | 1.08E-01 | FALSE | Yes |  |
| LPA 14:0 | 9.23E-02 | 1.09E-01 | FALSE | Yes | Yes |
| LPA 22:6 | 1.05E-01 | 1.23E-01 | FALSE | Yes | Yes |
| CAR 3:0 | 1.06E-01 | 1.24E-01 | FALSE | Yes |  |
| CAR 10:0 | 1.06E-01 | 1.24E-01 | FALSE | Yes |  |
| DL?AOA | 1.15E-01 | 1.34E-01 | FALSE | Yes |  |
| Me-Pent-Fur-C11:0 | 1.25E-01 | 1.45E-01 | FALSE | Yes |  |
| PC 30:0 | 1.26E-01 | 1.46E-01 | FALSE | Yes | Yes |
| LPC 22:0 | 1.28E-01 | 1.48E-01 | FALSE | Yes | Yes |
| Neo | 1.33E-01 | 1.53E-01 | FALSE | Yes |  |
| CAR 5:0 | 1.33E-01 | 1.53E-01 | FALSE | Yes |  |
| DEET | 1.35E-01 | 1.54E-01 | FALSE | Yes | Yes |
| PC 31:0 | 1.35E-01 | 1.54E-01 | FALSE |  | Yes |
| PC 37:2 | 1.46E-01 | 1.66E-01 | FALSE |  | Yes |
| CE 16:0 | 1.61E-01 | 1.83E-01 | FALSE |  | Yes |
| PC 34:2 | 1.63E-01 | 1.84E-01 | FALSE | Yes | Yes |
| CAR 10:1 | 1.64E-01 | 1.85E-01 | FALSE | Yes |  |
| LPC 17:1 | 1.73E-01 | 1.94E-01 | FALSE | Yes | Yes |
| CAR 14:3 | 2.01E-01 | 2.25E-01 | FALSE | Yes |  |
| Pro-leu | 2.11E-01 | 2.36E-01 | FALSE | Yes |  |
| CAR 13:1 | 2.20E-01 | 2.44E-01 | FALSE | Yes |  |
| PE 36:1 | 2.19E-01 | 2.44E-01 | FALSE |  | Yes |
| LPC 20:4 | 2.29E-01 | 2.53E-01 | FALSE | Yes | Yes |
| LPC 20:3 | 2.56E-01 | 2.83E-01 | FALSE | Yes | Yes |
| CAR C8:0 | 2.60E-01 | 2.86E-01 | FALSE | Yes |  |
| LPC 20:5 | 2.68E-01 | 2.95E-01 | FALSE | Yes | Yes |
| FANH2 18:0 | 2.86E-01 | 3.13E-01 | FALSE | Yes | Yes |
| SM 42:4 | 2.92E-01 | 3.19E-01 | FALSE | Yes | Yes |
| Stearamide | 3.22E-01 | 3.51E-01 | FALSE | Yes | Yes |
| LPC 18:1 | 3.51E-01 | 3.81E-01 | FALSE | Yes | Yes |
| LPC 22:5 | 3.78E-01 | 4.10E-01 | FALSE | Yes | Yes |
| CAR 13:0 | 4.42E-01 | 4.77E-01 | FALSE | Yes |  |
| CAR 12:2 | 4.43E-01 | 4.77E-01 | FALSE | Yes |  |
| FANH2 16:0 | 4.47E-01 | 4.81E-01 | FALSE | Yes | Yes |
| PE 40:5 | 4.54E-01 | 4.86E-01 | FALSE |  | Yes |
| CAR 6:0 | 5.02E-01 | 5.37E-01 | FALSE | Yes |  |
| PC 33:0 | 5.06E-01 | 5.39E-01 | FALSE |  | Yes |
| PE 38:1 | 5.48E-01 | 5.82E-01 | FALSE |  | Yes |
| Indoline | 6.07E-01 | 6.43E-01 | FALSE | Yes |  |
| DCA/CDCA | 6.09E-01 | 6.43E-01 | FALSE | Yes |  |
| CAR C8:1 | 6.15E-01 | 6.48E-01 | FALSE | Yes |  |
| SM 32:2 | 6.21E-01 | 6.52E-01 | FALSE |  | Yes |
| Biliverdin | 6.52E-01 | 6.84E-01 | FALSE | Yes |  |
| LPC 22:4 | 6.64E-01 | 6.94E-01 | FALSE | Yes | Yes |
| CAR 10:2 | 6.80E-01 | 7.09E-01 | FALSE | Yes |  |
| LPC 20:1 | 6.93E-01 | 7.21E-01 | FALSE | Yes | Yes |
| 27-HC | 6.98E-01 | 7.24E-01 | FALSE | Yes |  |
| LPC 17:0 | 7.31E-01 | 7.56E-01 | FALSE | Yes | Yes |
| CAR 11:1 | 7.75E-01 | 7.99E-01 | FALSE | Yes |  |
| Hex2Cer 34:2 | 7.83E-01 | 8.06E-01 | FALSE |  | Yes |
| LPC 20:0 | 8.03E-01 | 8.24E-01 | FALSE | Yes | Yes |
| CAR 4:0 | 8.16E-01 | 8.35E-01 | FALSE | Yes |  |
| CAR 6:1 | 8.20E-01 | 8.38E-01 | FALSE | Yes |  |
| PC 28:0 | 8.58E-01 | 8.73E-01 | FALSE |  | Yes |
| 16,17-DDP | 8.61E-01 | 8.74E-01 | FALSE |  |  |
| Arginine | 8.68E-01 | 8.79E-01 | FALSE | Yes |  |
| LPC 20:2 | 8.78E-01 | 8.87E-01 | FALSE | Yes | Yes |
| CAR 9:0 | 8.83E-01 | 8.90E-01 | FALSE | Yes |  |
| CAR 5:1 | 9.32E-01 | 9.36E-01 | FALSE | Yes |  |
| LPC 15:0 | 9.71E-01 | 9.73E-01 | FALSE | Yes | Yes |
| IPA | 9.73E-01 | 9.73E-01 | FALSE | Yes |  |

Note: P-values are from the ANOVA tests, and q-values are the false discovery rate (FDR)-adjusted p-values using the Benjamini-Hochberg method. Metabolites are sorted by increasing q-value; those with FDR < 0.05 are marked as Yes in the significance column.

**Supplementary Table 2. Baseline characteristics of participants across the three metabolically defined clusters.**

| Characteristics | Cluster1 | Cluster2 | Cluster3 | P value |
| --- | --- | --- | --- | --- |
| n | 100 | 35 | 28 |  |
| SEX, n (%) |  |  |  | 0.157 |
| Female | 49 (30.1%) | 16 (9.8%) | 8 (4.9%) |  |
| Male | 51 (31.3%) | 19 (11.7%) | 20 (12.3%) |  |
| AGE, mean ± sd | 43.9 ± 11.654 | 46.0 ± 11.7 | 48.5 ± 12.1 | 0.172 |
| BMI, median (IQR) | 22.6 (20.5, 25.1) | 23.8 (21.1, 26.9) | 26.6 (24.8, 29.1) | < 0.001 |
| TG, median (IQR) | 1.2 (0.9, 1.8) | 1.8 (0. 8, 1.6) | 1.9 (1.6, 2.4) | < 0.001 |
| TC, median (IQR) | 5.4 (4.9, 6.2) | 5.4 (5.1, 6.0) | 5.3 (4.7, 5.7) | 0.243 |
| HDL, median (IQR) | 1.5 (1.22, 1.7) | 1.5 (1.2, 1.8) | 1.1 (1.0, 1.3) | < 0.001 |
| LDL, median (IQR) | 3.1 (2.6, 3.7) | 3.1 (2.7, 3.7) | 3.0 (2.8, 3.5) | 0.886 |
| GLU, median (IQR) | 4.6 (4.4, 5.0) | 4.6 (4.4, 5.0) | 5.3 (4.8, 5.7) | < 0.001 |
| HbA1c, median (IQR) | 5.6 (5.4, 5.9) | 5.6 (5.4, 5.8) | 6 (5.9, 6.6) | 0.003 |
| BUN, median (IQR) | 4.9 (4.2, 5.6) | 5.02 (4.6, 5.8) | 5.7 (4.9, 7.3) | 0.011 |
| eGFR, mean ± sd | 100.0 ± 17.4 | 104.0 ± 17.5 | 81.1 ± 16.2 | < 0.001 |
| SBP, median (IQR) | 115.0 (105.0, 130.25) | 117.0 (107.5, 138.5) | 126.0 (114.0, 148.3) | 0.011 |
| DBP, median (IQR) | 71.0 (64.8, 77.3) | 73.0 (67.0, 83.0) | 79.5 (72.0, 87.3) | 0.007 |
| Carotid plaque, n (%) |  |  |  | < 0.001 |
| NO | 45 (52.3%) | 12 (14%) | 8 (9.3%) |  |
| YES | 5 (5.8%) | 5 (5.8%) | 11 (12.8%) |  |

Demographic, anthropometric, metabolic, and renal function indicators are presented as mean ± SD or median (IQR), as appropriate. Differences across clusters were assessed using Kruskal–Wallis or chi-squared tests.
